# Supplementary material for: Phylogeographic Distribution of Human and Hare Francisella Tularensis Subsp. Holarctica Strains in the Netherlands and Its Pathology in European Brown Hares (Lepus Europaeus)
Source: Front Cell Infect Microbiol. 2019 Feb 11;9:11. doi: 10.3389/fcimb.2019.00011 (PMC6378916; doi:10.3389/fcimb.2019.00011)
Supplement: Supplementary file 1 [file Table_1.XLSX]

## Sheet: Suppl Table
Supplementary Table. CanSNP assay results.
								Clade (Figure 1)
								B.12	B.12	B.6	B.4	B.7	B.10	B.11	B.13	B.39	B.27	B.26	B.20	B.23
								Typing marker
ID	WBVR ID	DWHC ID	Date of infection	Host	Province where infected	Basal clade	Subclade	Ftind33	B.19	Ftind49	Ftind38	B.40	B.41	B.11	B.13	B.39	B.43	B.26	B.42	B.23
1	NA	NA	October 2011	human	Overijssel	B.6	B.11a	NA	NA	NA	NA	NA	NA	NA	NA	NA	NA	NA	NA	NA
2	X13007412	3130515026	May 2013	hare	Limburg	B.6	B.11	ANC	NA	DER	ANC	ANC	DER	DER	NA	NA	NA	NA	NA	NA
3	13012215-001	NA	July 2013	human	Limburg	B.6	B.11	ANC	NA	DER	ANC	ANC	DER	DER	NA	NA	NA	NA	NA	NA
4	14002928	NA	Jan 2014	human	Zeeland	B.12	B.20c	DER	NA	ANC	ANC	ANC	ANC	ANC	DER	ANC	ANC	DER	DER	ANC
5	14003114-001	NA	Jan 2014	hare	Zeeland	B.12	B.20c	DER	NA	ANC	ANC	ANC	ANC	ANC	DER	ANC	ANC	DER	DER	ANC
6	X14005886-005	3140410025	April 2014	hare	Utrecht	B.12	B.20c	DER	NA	ANC	ANC	ANC	ANC	ANC	DER	ANC	ANC	DER	DER	ANC
7	15003398-004	3150210005	Feb 2015	hare	Friesland	B.12	B.20c	NA	DER	ANC	ANC	NA	NA	NA	DER	ANC	ANC	DER	DER	ANC
8	15003398-005	3150210006	Feb 2015	hare	Friesland	B.12	B.20c	NA	DER	ANC	ANC	NA	NA	NA	DER	ANC	ANC	DER	DER	ANC
9	X15004545-002	3150302006	Feb 2015	hare	Friesland	B.12	B.20c	NA	DER	ANC	ANC	NA	NA	NA	DER	ANC	ANC	DER	DER	ANC
10	X15004999-003	3150304009	March 2015	hare	Friesland	B.12	B.20c	NA	DER	ANC	ANC	NA	NA	NA	DER	ANC	ANC	DER	DER	ANC
11	X15004999-006	3150305006	March 2015	hare	Friesland	B.12	B.20c	NA	DER	ANC	ANC	NA	NA	NA	DER	ANC	ANC	DER	DER	ANC
12	X15004999-010	3150310009	March 2015	hare	Overijssel	B.12	B.20c	NA	DER	ANC	ANC	NA	NA	NA	DER	ANC	ANC	DER	DER	ANC
13	X15005198-001	3150311005	March 2015	hare	Friesland	B.12	B.20c	NA	DER	ANC	ANC	NA	NA	NA	DER	ANC	ANC	DER	DER	ANC
14	X15005198-003	3150311064	March 2015	hare	Friesland	B.12	B.20c	NA	DER	ANC	ANC	NA	NA	NA	DER	ANC	ANC	DER	DER	ANC
15	X15005198-005	3150311065	March 2015	hare	Friesland	B.12	B.20c	NA	DER	ANC	ANC	NA	NA	NA	DER	ANC	ANC	DER	DER	ANC
16	X15005198-007	3150311066	March 2015	hare	Friesland	B.12	B.20c	NA	DER	ANC	ANC	NA	NA	NA	DER	ANC	ANC	DER	DER	ANC
17	X15006489-003	3150330014	March 2015	hare	Friesland	B.12	B.20c	NA	DER	ANC	ANC	NA	NA	NA	DER	ANC	ANC	DER	DER	ANC
18	X15007197-004	3150423024	April 2015	hare	Friesland	B.12	NA	DER	NA	ANC	ANC	NA	NA	NA	NA	NA	NA	NA	NA	NA
19	X15008424-002	3150519005	May 2015	hare	Friesland	B.12	NA	DER	NA	ANC	ANC	NA	NA	NA	NA	NA	NA	NA	NA	NA
20	X15010486-001	3150629001	June 2015	hare	Gelderland	B.6	NA	ANC	NA	DER	ANC	NA	NA	NA	NA	NA	NA	NA	NA	NA
21	15012907	NA	August 2015	human	Utrecht, possibly Overijssel	B.6	B.11b,d	NA	ANC	DER	ANC	ANC	DER	NA	NA	NA	NA	NA	NA	NA
22	X16000739-001	3160106002	Jan 2016	hare	Friesland	B.12	NA	DER	NA	ANC	ANC	NA	NA	NA	NA	NA	NA	NA	NA	NA
23	NA	3160318004	March 2016	hare	Groningen	B.6	NA	ANC	NA	DER	ANC	NA	NA	NA	NA	NA	NA	NA	NA	NA
24	16005559-001	NA	May 2016	hare	Utrecht	B.6	NA	ANC	NA	DER	ANC	NA	NA	NA	NA	NA	NA	NA	NA	NA
25	16007282-001	NA	May 2016	human	South Holland	B.12	B.33b,e	DER	NA	ANC	ANC	NA	NA	NA	NA	NA	NA	NA	NA	NA
27	16013069-001	3161007004	October 2016	hare	South Holland	B.12	NA	DER	NA	ANC	ANC	NA	NA	NA	NA	NA	NA	NA	NA	NA
28	16012974-001	3161014034	October 2016	hare	Utrecht	B.6	NA	ANC	NA	DER	ANC	NA	NA	NA	NA	NA	NA	NA	NA	NA
29	16014529	3161114032	November 2016	hare	Utrecht	B.6	NA	ANC	NA	DER	ANC	NA	NA	NA	NA	NA	NA	NA	NA	NA
30	16014461-001	3161104001	November 2016	hare	Utrecht	B.6	NA	ANC	NA	DER	ANC	NA	NA	NA	NA	NA	NA	NA	NA	NA
31	16014463-001	3161108001	November 2016	hare	Utrecht	B.6	NA	ANC	NA	DER	ANC	NA	NA	NA	NA	NA	NA	NA	NA	NA
32	17018221-001	NA	October 2016	human	Utrecht	B.6	NA	ANC	NA	DER	ANC	NA	NA	NA	NA	NA	NA	NA	NA	NA
33	X17000610	NA	December 2016	human	Gelderland	B.6	B.11b,f	ANC	NA	DER	ANC	NA	NA	NA	NA	NA	NA	NA	NA	NA
34	17003117	3170303031	March 2017	hare	Utrecht	B.6	NA	ANC	NA	DER	ANC	NA	NA	NA	NA	NA	NA	NA	NA	NA
35	17004075	3170323037	March 2017	hare	Utrecht	B.6	NA	ANC	NA	DER	ANC	NA	NA	NA	NA	NA	NA	NA	NA	NA
36	17006870	3170517002	May 2017	hare	Utrecht	B.6	NA	ANC	NA	DER	ANC	NA	NA	NA	NA	NA	NA	NA	NA	NA
37	17016409	3171110018	November 2017	hare	Limburg	B.6	NA	ANC	NA	DER	ANC	NA	NA	NA	NA	NA	NA	NA	NA	NA
a CanSNPer result. Public genome BD11-00177 NCBI BioSample accession number SAMN02690826 (Coolen et al. 2013; Mahar et al. 2013). No typing assay results.
b CanSNPer identification
c The clade is denoted B.20 since the first canSNP used for this branch was B.20. In this study, B.42 was used for typing which is another canSNP along the same branch.
d ENA accession number ERS2585218
e ENA accession number ERS2585217
f ENA accession number ERS2585220
